# Supplementary material for: Are both individual-level and county-level social capital associated with individual health? A serial cross-sectional analysis in China, 2010–2015
Source: HighWire-hosted journal article supplement (doi:10.1136/bmjopen-2020-044616), 2021-08-01
Supplement: bmjopen-2020-044616supp001_data_supplement.pdf [file bmjopen-2020-044616supp001_data_supplement.pdf]

## Supplementary Materials and Data

### **Supplementary Material 1: Details of the questions for social capital indicators**

*Frequency of socializing* We assessed respondents' frequency of socializing by the question "How often did you engage in social interactions in your spare time in the past year?" Responses were categorized into "low" (including "never", "seldom", and "sometimes") and "high" (including "often" and "very frequently") frequency.

*Civic participation* We assessed civic participation by the question "Did you vote in the latest neighborhood/village committee election?". According to related laws,<sup>1,2</sup> neighborhood committees and village committees are the basic-level administrative units, and residents aged 18 or above in each neighborhood/village directly elect members to the two committees. Hence, voting in the election reflects people's willingness to participate in civic activities in a county. The voting rate in a county reflects the extent of a county's social cohesion, and this measurement has been used in several previous studies.<sup>3-6</sup>

*Trust* We measured respondents' trust of others based on the question "Generally speaking, do you agree that most people in the society are trustworthy?" Responses were categorized into "low" (including "strongly disagree", "disagree", and "neutral") and "high" (including "agree" and "strongly agree") trust.

### **Supplementary Material 2: Calculation of county-level social capital**

We calculate county-level social capital by using two-level binary logistic regressions with individuals at Level 1 nested within counties at Level 2. Following a previous study,<sup>7</sup> we estimated the variance component in each individual-level social capital variable that can be attributed to counties separately. This method was also used in several multilevel social capital studies.<sup>8-10</sup> We adjusted for individual characteristics that can influence each individual-level social capital variable, including gender (male, female), age (years), ethnicity (*Han*, non-*Han*), marital status (married/cohabitation, never married/divorced/separated/widowed), education (primary school or below, junior secondary school, senior secondary school, and college or above), occupation, poverty, and places of residence (rural, urban).

Taking  $y_{ij}$  as a binary response on a social capital variable for respondent  $i$  in county  $j$ , the regression model was specified as follows:

$$\text{Log} \left( \frac{p_{ij}}{1 - p_{ij}} \right) = \beta_0 + \beta_1 x_{1ij} + \beta_2 x_{2ij} + \dots + \beta_p x_{pij} + \mu_j$$

where  $p_{ij} = \text{Pr}(y_{ij}=1)$ ,  $\beta_0$  is the grand mean of the social capital variable,  $x_{pij}$  is the  $p$ th individual characteristics for respondent  $i$  in county  $j$ , and  $\mu_j$  is the random effect at Level 2, i.e., the residuals at county level.

Based on the regression model above, the county-level social capital of county  $j$  was calculated by the sum of  $\beta_0$  and  $\mu_j$ . We transformed the coefficient to probability, i.e.,  $p_{ij} = \frac{e^{(\beta_0 + \mu_j)}}{1 + e^{(\beta_0 + \mu_j)}}$ , which means the probability of  $y_{ij}=1$  for county  $j$  in which respondent  $i$  lived after adjusting for individual characteristics. In other words, it is the probability of  $y_{ij}=1$  that can be attributed to counties after adjusting for individual characteristics (i.e., compositional factors). Hence, it is the contextual construct of social capital at county level.<sup>7</sup> We reported the probability as a percentage. Higher percentage indicated higher county-level social capital.

We performed the above regression model for each of the three social capital variables (i.e., frequency of socializing, civic participation, and trust) in each year. For example, if  $y_{ij}$  is a response on trust

(1=high trust, 0=low trust) for respondent  $i$  in county  $j$  in 2010, then  $p_{ij}$  is the probability of high trust in county  $j$  where respondent  $i$  lived in 2010 after adjusting for individual characteristics of respondent  $i$ . In other words, if respondent  $i$  lived in county  $j$  in 2010, then taking other individual characteristics into account, the probability of he/she having high trust was  $p_{ij}$  and this probability,  $p_{ij}$ , could be attributed to living in county  $j$ .

### **Supplementary Material 3: Details of occupation and poverty**

We classified occupation according to the International Standard Classification of Occupations 2008 (ISCO-08) (i.e., Skill level 3 or 4: managers, professionals, and technicians and associate professionals; Skill 2: clerical support workers; services and sales workers; skilled agricultural, forestry and fishery workers; craft and related trades workers; plant and machine operators, and assemblers; Skill 1: elementary occupations).<sup>11</sup> We further included students, the unemployed, and retired people as “non-employed.”

We assessed poverty by equivalized household income, which was calculated by dividing household income by the squared root of the number of household members. We defined respondents as “poor” if their equivalized household annual incomes were less than or equal to half of the median equivalized household annual income in each survey year. We further included “do not know income” as a separate category.

### **Supplementary Material 4: The weighting method used for two-level regression models**

Studies have indicated that it is required to use scaling weights instead of the “raw” weights in multilevel models.<sup>12–14</sup> Following previous studies,<sup>12,15</sup> we calculated scaled individual-level weights as below:

$$w_{ij}^* = w_{ij} \left( \frac{n_j}{\sum_i w_{ij}} \right)$$

where  $w_{ij}^*$  is the scaled weight for individual  $i$  in cluster  $j$ ,  $w_{ij}$  is the unscaled weight for individual  $i$  in cluster  $j$ , and  $n_j$  is the sample size in cluster  $j$ . Each county represents one cluster in our study.

**Supplementary Material 5: Supplementary Tables****Supplementary Table 1. Missing data**

|                            | 2010           | 2012           | 2013           | 2015           |
|----------------------------|----------------|----------------|----------------|----------------|
|                            | Total = 11,783 | Total = 11,765 | Total = 11,438 | Total = 10,968 |
| Gender                     | 0              | 0              | 0              | 0              |
| Age                        | 9              | 4              | 2              | 0              |
| Ethnicity                  | 22             | 9              | 12             | 20             |
| Marital status             | 8              | 0              | 23             | 0              |
| Education                  | 15             | 4              | 6              | 29             |
| Annual household income    | 758            | 548            | 614            | 348            |
| Number of household member | 0              | 0              | 0              | 0              |
| Occupation                 | 80             | 74             | 107            | 218            |
| Frequency of socializing   | 76             | 8              | 4              | 6              |
| Trust                      | 21             | 6              | 14             | 41             |
| Civic participation        | 28             | 11             | 15             | 102            |
| Place of residence         | 0              | 0              | 0              | 0              |
| Physical health            | 15             | 4              | 2              | 7              |
| Mental health              | 51             | 17             | 21             | 26             |

**Supplementary Table 2. Unweighted sample characteristics**

|                                   | 2010              | 2012              | 2013              | 2015              |
|-----------------------------------|-------------------|-------------------|-------------------|-------------------|
|                                   | Mean±SD/%         | Mean±SD/%         | Mean±SD/%         | Mean±SD/%         |
| <b>Individual level</b>           | <i>N</i> = 10,827 | <i>N</i> = 11,104 | <i>N</i> = 10,663 | <i>N</i> = 10,235 |
| <b>Physical Health</b>            |                   |                   |                   |                   |
| Poor                              | 41.71             | 44.09             | 35.81             | 40.12             |
| Good                              | 58.29             | 55.91             | 64.19             | 59.88             |
| <b>Mental Health</b>              |                   |                   |                   |                   |
| Poor                              | 34.24             | 34.77             | 28.79             | 32.34             |
| Good                              | 65.76             | 65.23             | 71.21             | 67.66             |
| <b>Sociodemographic factors</b>   |                   |                   |                   |                   |
| Gender                            |                   |                   |                   |                   |
| Female                            | 51.79             | 48.83             | 49.85             | 53.10             |
| Male                              | 48.21             | 51.17             | 50.15             | 46.90             |
| Age (years)                       | 47.50±15.66       | 49.07±16.22       | 48.72±16.44       | 50.61±16.91       |
| Ethnicity                         |                   |                   |                   |                   |
| Non-Han                           | 9.11              | 8.79              | 8.59              | 7.96              |
| Han                               | 90.89             | 91.21             | 91.41             | 92.04             |
| Marital status                    |                   |                   |                   |                   |
| Single/separated/divorced/widowed | 19.44             | 19.92             | 21.00             | 21.71             |
| Cohabit/married                   | 80.56             | 80.08             | 79.00             | 78.29             |
| <b>Socioeconomic factors</b>      |                   |                   |                   |                   |
| Education                         |                   |                   |                   |                   |
| Primary school or below           | 36.92             | 37.23             | 36.18             | 38.21             |
| Junior secondary school           | 29.52             | 28.31             | 29.04             | 28.52             |
| Senior secondary school or equal  | 19.13             | 18.86             | 18.88             | 17.81             |
| College or above                  | 14.44             | 15.60             | 15.90             | 15.46             |
| Occupation                        |                   |                   |                   |                   |
| Skill 3 or 4                      | 10.32             | 12.81             | 11.54             | 9.83              |
| Skill 2                           | 50.12             | 48.06             | 47.25             | 42.61             |
| Skill 1                           | 3.61              | 2.88              | 3.48              | 4.14              |
| Non-employed                      | 35.96             | 36.25             | 37.74             | 43.42             |
| Poverty                           |                   |                   |                   |                   |
| Poor                              | 12.08             | 16.38             | 14.67             | 17.10             |
| Non-poor                          | 81.68             | 76.31             | 77.06             | 77.54             |
| Do not know income                | 6.24              | 7.30              | 8.27              | 5.36              |
| Place of residence                |                   |                   |                   |                   |
| Urban                             | 59.64             | 59.68             | 59.98             | 57.82             |
| Rural                             | 40.36             | 40.32             | 40.02             | 42.18             |
| <b>Social capital</b>             |                   |                   |                   |                   |
| Frequency of socializing          |                   |                   |                   |                   |
| Low                               | 78.05             | 74.07             | 72.29             | 72.26             |
| High                              | 21.95             | 25.93             | 27.71             | 27.74             |
| Civic participation               |                   |                   |                   |                   |

|                              |                |                |                |                |
|------------------------------|----------------|----------------|----------------|----------------|
| No                           | 53.59          | 50.93          | 56.13          | 52.87          |
| Yes                          | 46.41          | 49.07          | 43.87          | 47.13          |
| Trust                        |                |                |                |                |
| Low                          | 33.92          | 35.27          | 43.62          | 35.89          |
| High                         | 66.08          | 64.73          | 56.38          | 64.11          |
| <b>County level</b>          | <i>N</i> = 133 | <i>N</i> = 131 | <i>N</i> = 126 | <i>N</i> = 130 |
| <b>Social Capital</b>        |                |                |                |                |
| Frequency of socializing (%) | 19.57±6.38     | 31.43±8.58     | 34.66±11.25    | 38.95±9.61     |
| Civic participation (%)      | 25.17±12.15    | 21.13±9.99     | 18.77±10.68    | 22.87±14.25    |
| Trust (%)                    | 46.87±7.29     | 45.80±9.25     | 42.23±10.31    | 43.92±6.36     |

**Supplementary Table 3. Associations of individual- and county-level social capital with physical health, 2010-2015, stratified by place of residence (Two-level binary logistic model, with “poor” physical health as the reference group)**

|                                   | Rural                  |                        |                        |                        | Urban                  |                        |                        |                        |
|-----------------------------------|------------------------|------------------------|------------------------|------------------------|------------------------|------------------------|------------------------|------------------------|
|                                   | 2010                   | 2012                   | 2013                   | 2015                   | 2010                   | 2012                   | 2013                   | 2015                   |
|                                   | Adjusted OR            |
|                                   | (95% CI)               |
| <b>Sociodemographic factors</b>   |                        |                        |                        |                        |                        |                        |                        |                        |
| Gender                            |                        |                        |                        |                        |                        |                        |                        |                        |
| Female                            | 1                      | 1                      | 1                      | 1                      | 1                      | 1                      | 1                      | 1                      |
| Male                              | 1.50**<br>(1.30,1.74)  | 1.38**<br>(1.20,1.59)  | 1.19*<br>(1.03,1.38)   | 1.37***<br>(1.19,1.57) | 1.19**<br>(1.06,1.33)  | 1.24***<br>(1.11,1.39) | 1.20**<br>(1.06,1.36)  | 1.24***<br>(1.10,1.41) |
| Age                               | 0.96***<br>(0.95,0.96) | 0.96***<br>(0.96,0.97) | 0.96***<br>(0.96,0.97) | 0.97***<br>(0.96,0.97) | 0.96***<br>(0.96,0.96) | 0.96***<br>(0.96,0.97) | 0.96***<br>(0.96,0.96) | 0.96***<br>(0.96,0.97) |
| Ethnicity                         |                        |                        |                        |                        |                        |                        |                        |                        |
| Non- <i>Han</i>                   | 1                      | 1                      | 1                      | 1                      | 1                      | 1                      | 1                      | 1                      |
| <i>Han</i>                        | 1.01<br>(0.74,1.37)    | 0.99<br>(0.75,1.30)    | 0.79<br>(0.59,1.06)    | 1.17<br>(0.88,1.56)    | 0.80<br>(0.61,1.05)    | 1.00<br>(0.77,1.30)    | 1.27<br>(0.95,1.69)    | 1.01<br>(0.76,1.34)    |
| Marriage                          |                        |                        |                        |                        |                        |                        |                        |                        |
| Single/separated/divorced/widowed | 1                      | 1                      | 1                      | 1                      | 1                      | 1                      | 1                      | 1                      |
| Cohabit/married                   | 1.02<br>(0.83,1.26)    | 0.98<br>(0.81,1.19)    | 0.96<br>(0.79,1.17)    | 1.00<br>(0.83,1.21)    | 1.03<br>(0.89,1.19)    | 0.87<br>(0.75,1.00)    | 1.04<br>(0.90,1.22)    | 0.89<br>(0.76,1.03)    |
| <b>Socioeconomic factors</b>      |                        |                        |                        |                        |                        |                        |                        |                        |
| Education                         |                        |                        |                        |                        |                        |                        |                        |                        |
| Primary school or below           | 1                      | 1                      | 1                      | 1                      | 1                      | 1                      | 1                      | 1                      |
| Junior secondary school           | 1.39***<br>(1.17,1.64) | 1.49***<br>(1.27,1.74) | 1.64***<br>(1.39,1.95) | 1.24*<br>(1.05,1.47)   | 0.97<br>(0.82,1.14)    | 0.92<br>(0.79,1.08)    | 0.94<br>(0.79,1.12)    | 1.02<br>(0.87,1.21)    |

|                                        |                        |                        |                        |                        |                        |                        |                        |                        |
|----------------------------------------|------------------------|------------------------|------------------------|------------------------|------------------------|------------------------|------------------------|------------------------|
| Senior secondary school or equal       | 1.49**<br>(1.14,1.96)  | 1.53**<br>(1.18,1.99)  | 1.54**<br>(1.17,2.03)  | 2.08***<br>(1.57,2.75) | 1.15<br>(0.97,1.36)    | 1.18<br>(0.99,1.40)    | 1.25*<br>(1.04,1.52)   | 1.21*<br>(1.00,1.45)   |
| College or above                       | 1.60<br>(0.84,3.04)    | 2.77**<br>(1.53,5.00)  | 3.18***<br>(1.72,5.89) | 1.78*<br>(1.09,2.89)   | 1.26*<br>(1.02,1.55)   | 1.25*<br>(1.02,1.52)   | 1.28*<br>(1.02,1.60)   | 1.46***<br>(1.17,1.83) |
| Poverty                                |                        |                        |                        |                        |                        |                        |                        |                        |
| Poor                                   | 1                      | 1                      | 1                      | 1                      | 1                      | 1                      | 1                      | 1                      |
| Non-poor                               | 1.70***<br>(1.42,2.03) | 1.59***<br>(1.36,1.87) | 1.56***<br>(1.31,1.85) | 1.60***<br>(1.37,1.88) | 1.25<br>(0.98,1.60)    | 1.73***<br>(1.39,2.15) | 1.83***<br>(1.46,2.30) | 1.54***<br>(1.24,1.91) |
| Do not know income                     | 1.58**<br>(1.13,2.19)  | 1.54**<br>(1.17,2.03)  | 1.28<br>(0.98,1.69)    | 1.02<br>(0.74,1.41)    | 1.24<br>(0.89,1.73)    | 1.33<br>(0.98,1.79)    | 1.71***<br>(1.26,2.32) | 1.53*<br>(1.10,2.14)   |
| Occupation                             |                        |                        |                        |                        |                        |                        |                        |                        |
| Skill level 3 or 4                     | 1                      | 1                      | 1                      | 1                      | 1                      | 1                      | 1                      | 1                      |
| Skill level 2                          | 0.91<br>(0.56,1.48)    | 0.88<br>(0.58,1.36)    | 0.78<br>(0.48,1.26)    | 1.17<br>(0.73,1.86)    | 0.89<br>(0.73,1.09)    | 0.97<br>(0.82,1.16)    | 1.00<br>(0.82,1.23)    | 0.97<br>(0.78,1.22)    |
| Skill level 1                          | 1.53<br>(0.79,2.94)    | 1.24<br>(0.66,2.30)    | 1.03<br>(0.53,1.99)    | 1.29<br>(0.72,2.28)    | 1.04<br>(0.75,1.45)    | 0.89<br>(0.64,1.24)    | 0.93<br>(0.66,1.32)    | 0.73<br>(0.52,1.03)    |
| Non-employed                           | 0.64<br>(0.39,1.06)    | 0.74<br>(0.48,1.15)    | 0.49**<br>(0.30,0.80)  | 1.00<br>(0.62,1.60)    | 0.65***<br>(0.53,0.80) | 0.74***<br>(0.61,0.88) | 0.64***<br>(0.52,0.80) | 0.70**<br>(0.56,0.87)  |
| <b>Individual-level social capital</b> |                        |                        |                        |                        |                        |                        |                        |                        |
| Frequency of socializing               |                        |                        |                        |                        |                        |                        |                        |                        |
| Low                                    | 1                      | 1                      | 1                      | 1                      | 1                      | 1                      | 1                      | 1                      |
| High                                   | 1.45***<br>(1.19,1.76) | 1.50***<br>(1.27,1.78) | 1.28**<br>(1.10,1.50)  | 1.37***<br>(1.19,1.59) | 1.51***<br>(1.31,1.73) | 1.33***<br>(1.17,1.51) | 1.27**<br>(1.09,1.47)  | 1.34***<br>(1.15,1.55) |
| Civic participation                    |                        |                        |                        |                        |                        |                        |                        |                        |
| No                                     | 1                      | 1                      | 1                      | 1                      | 1                      | 1                      | 1                      | 1                      |
| Yes                                    | 1.04                   | 1.00                   | 0.89                   | 0.88                   | 0.97                   | 1.01                   | 1.12                   | 1.09                   |

|                                   |             |             |             |             |             |             |             |             |
|-----------------------------------|-------------|-------------|-------------|-------------|-------------|-------------|-------------|-------------|
|                                   | (0.88,1.21) | (0.86,1.16) | (0.77,1.04) | (0.76,1.02) | (0.85,1.10) | (0.90,1.14) | (0.98,1.29) | (0.95,1.25) |
| Trust                             |             |             |             |             |             |             |             |             |
| Low                               | 1           | 1           | 1           | 1           | 1           | 1           | 1           | 1           |
| High                              | 1.24**      | 1.26**      | 1.07        | 1.40***     | 1.39***     | 1.31***     | 1.35***     | 1.41***     |
|                                   | (1.06,1.45) | (1.09,1.46) | (0.92,1.24) | (1.21,1.62) | (1.23,1.56) | (1.17,1.47) | (1.20,1.54) | (1.24,1.59) |
| County-level social capital       |             |             |             |             |             |             |             |             |
| High frequency of socializing (%) | 0.99        | 1.01        | 1.00        | 1.01*       | 0.99        | 1.00        | 1.00        | 1.01**      |
|                                   | (0.96,1.01) | (0.99,1.02) | (0.98,1.01) | (1.00,1.03) | (0.97,1.01) | (0.99,1.01) | (0.99,1.02) | (1.00,1.02) |
| Civic participation (%)           | 1.01        | 1.00        | 1.00        | 0.99        | 1.00        | 0.99*       | 0.98*       | 0.99**      |
|                                   | (0.99,1.02) | (0.99,1.02) | (0.99,1.02) | (0.98,1.01) | (0.99,1.00) | (0.98,1.00) | (0.97,1.00) | (0.98,1.00) |
| Trust (%)                         | 1.00        | 1.01        | 1.01        | 1.01        | 1.00        | 1.01        | 1.00        | 1.01        |
|                                   | (0.97,1.02) | (0.99,1.02) | (0.99,1.03) | (0.99,1.03) | (0.99,1.02) | (1.00,1.02) | (0.99,1.01) | (0.99,1.03) |
| <i>N of individuals</i>           | 4,370       | 4,477       | 4,267       | 4,317       | 6,457       | 6,627       | 6,396       | 5,918       |
| <i>N of counties</i> <sup>#</sup> | 89          | 87          | 86          | 87          | 129         | 125         | 121         | 124         |
| <i>ICC</i>                        | 0.122       | 0.059       | 0.092       | 0.058       | 0.069       | 0.046       | 0.116       | 0.049       |

\* p < 0.05, \*\* p < 0.01, \*\*\* p < 0.001

<sup>#</sup> One county (i.e., county-level administrative unit) could include both rural and urban samples. Hence, the total number of counties in our study is not equal to the sum of the number of counties in rural samples and the number of counties in urban samples.

**Supplementary Table 4. Associations of individual-level and county-level social capital with mental health, 2010-2015, stratified by place of residence (Two-level binary logistic model, with “poor” mental health as the reference group)**

|                                   | Rural                              |                                    |                                    |                                    | Urban                              |                                    |                                    |                                    |
|-----------------------------------|------------------------------------|------------------------------------|------------------------------------|------------------------------------|------------------------------------|------------------------------------|------------------------------------|------------------------------------|
|                                   | 2010                               | 2012                               | 2013                               | 2015                               | 2010                               | 2012                               | 2013                               | 2015                               |
|                                   | Adjusted OR<br>(95% CI)            |
| <b>Sociodemographic factors</b>   |                                    |                                    |                                    |                                    |                                    |                                    |                                    |                                    |
| Gender                            |                                    |                                    |                                    |                                    |                                    |                                    |                                    |                                    |
| Female                            | 1                                  | 1                                  | 1                                  | 1                                  | 1                                  | 1                                  | 1                                  | 1                                  |
| Male                              | 1.41 <sup>***</sup><br>(1.22,1.61) | 1.47 <sup>***</sup><br>(1.28,1.69) | 1.11<br>(0.96,1.29)                | 1.41 <sup>***</sup><br>(1.23,1.63) | 1.13 <sup>*</sup><br>(1.01,1.27)   | 1.24 <sup>***</sup><br>(1.10,1.38) | 1.13<br>(1.00,1.27)                | 1.16 <sup>*</sup><br>(1.02,1.31)   |
| Age                               | 0.98 <sup>***</sup><br>(0.98,0.99) | 0.98 <sup>***</sup><br>(0.98,0.99) | 0.99 <sup>***</sup><br>(0.99,1.00) | 0.99 <sup>***</sup><br>(0.98,0.99) | 0.99 <sup>**</sup><br>(0.99,1.00)  | 1.00<br>(0.99,1.00)                | 0.99 <sup>***</sup><br>(0.98,0.99) | 1.00<br>(0.99,1.00)                |
| Ethnicity                         |                                    |                                    |                                    |                                    |                                    |                                    |                                    |                                    |
| Non-Han                           | 1                                  | 1                                  | 1                                  | 1                                  | 1                                  | 1                                  | 1                                  | 1                                  |
| Han                               | 0.89<br>(0.67,1.20)                | 0.91<br>(0.69,1.20)                | 0.86<br>(0.64,1.16)                | 0.97<br>(0.72,1.30)                | 0.93<br>(0.71,1.21)                | 1.26<br>(0.98,1.63)                | 1.19<br>(0.90,1.58)                | 1.16<br>(0.88,1.54)                |
| Marriage                          |                                    |                                    |                                    |                                    |                                    |                                    |                                    |                                    |
| Single/separated/divorced/widowed | 1                                  | 1                                  | 1                                  | 1                                  | 1                                  | 1                                  | 1                                  | 1                                  |
| Cohabit/married                   | 1.16<br>(0.96,1.40)                | 1.13<br>(0.94,1.35)                | 1.46 <sup>***</sup><br>(1.21,1.75) | 1.19 <sup>*</sup><br>(1.00,1.43)   | 1.27 <sup>***</sup><br>(1.11,1.46) | 1.21 <sup>**</sup><br>(1.06,1.39)  | 1.20 <sup>*</sup><br>(1.03,1.39)   | 1.19 <sup>*</sup><br>(1.03,1.37)   |
| <b>Socioeconomic factors</b>      |                                    |                                    |                                    |                                    |                                    |                                    |                                    |                                    |
| Education                         |                                    |                                    |                                    |                                    |                                    |                                    |                                    |                                    |
| Primary school or below           | 1                                  | 1                                  | 1                                  | 1                                  | 1                                  | 1                                  | 1                                  | 1                                  |
| Junior secondary school           | 1.33 <sup>***</sup><br>(1.13,1.57) | 1.26 <sup>**</sup><br>(1.07,1.48)  | 1.42 <sup>***</sup><br>(1.19,1.70) | 1.09<br>(0.92,1.29)                | 1.30 <sup>**</sup><br>(1.11,1.53)  | 1.18 <sup>*</sup><br>(1.00,1.39)   | 1.05<br>(0.88,1.25)                | 1.43 <sup>***</sup><br>(1.21,1.69) |

|                                        |                        |                        |                        |                        |                        |                        |                        |                        |
|----------------------------------------|------------------------|------------------------|------------------------|------------------------|------------------------|------------------------|------------------------|------------------------|
| Senior secondary school or equal       | 1.46**<br>(1.12,1.90)  | 1.39*<br>(1.06,1.82)   | 1.28<br>(0.97,1.69)    | 1.48**<br>(1.12,1.94)  | 1.44***<br>(1.21,1.71) | 1.54***<br>(1.30,1.84) | 1.31**<br>(1.08,1.59)  | 1.76***<br>(1.46,2.12) |
| College or above                       | 1.27<br>(0.70,2.29)    | 2.16**<br>(1.21,3.85)  | 3.48***<br>(1.97,6.16) | 1.57<br>(0.99,2.49)    | 1.68**<br>(1.37,2.07)  | 1.51***<br>(1.24,1.85) | 1.31*<br>(1.05,1.64)   | 1.94***<br>(1.55,2.42) |
| Poverty                                |                        |                        |                        |                        |                        |                        |                        |                        |
| Poor                                   | 1                      | 1                      | 1                      | 1                      | 1                      | 1                      | 1                      | 1                      |
| Non-poor                               | 1.69***<br>(1.43,2.01) | 1.60***<br>(1.37,1.87) | 1.78***<br>(1.50,2.11) | 1.54***<br>(1.31,1.80) | 1.77***<br>(1.40,2.22) | 1.77***<br>(1.43,2.18) | 1.77***<br>(1.42,2.22) | 1.41**<br>(1.14,1.74)  |
| Do not know income                     | 2.23***<br>(1.62,3.07) | 1.49**<br>(1.14,1.95)  | 1.27<br>(0.98,1.65)    | 1.22<br>(0.89,1.67)    | 1.65**<br>(1.21,2.26)  | 1.61**<br>(1.20,2.14)  | 1.43*<br>(1.07,1.93)   | 1.45*<br>(1.05,1.99)   |
| Occupation                             |                        |                        |                        |                        |                        |                        |                        |                        |
| Skill level 3 or 4                     | 1                      | 1                      | 1                      | 1                      | 1                      | 1                      | 1                      | 1                      |
| Skill level 2                          | 0.73<br>(0.45,1.18)    | 0.91<br>(0.59,1.43)    | 1.00<br>(0.62,1.61)    | 1.28<br>(0.81,2.01)    | 1.04<br>(0.86,1.26)    | 0.98<br>(0.82,1.17)    | 0.96<br>(0.79,1.17)    | 1.14<br>(0.92,1.42)    |
| Skill level 1                          | 0.66<br>(0.35,1.21)    | 0.61<br>(0.32,1.13)    | 0.95<br>(0.49,1.82)    | 1.22<br>(0.69,2.14)    | 1.34<br>(0.96,1.87)    | 1.16<br>(0.83,1.62)    | 1.04<br>(0.74,1.47)    | 1.03<br>(0.73,1.44)    |
| Non-employed                           | 0.58*<br>(0.36,0.95)   | 0.85<br>(0.54,1.34)    | 0.70<br>(0.43,1.15)    | 1.05<br>(0.66,1.65)    | 1.00<br>(0.82,1.22)    | 1.01<br>(0.85,1.22)    | 0.99<br>(0.80,1.22)    | 1.00<br>(0.81,1.24)    |
| <b>Individual-level social capital</b> |                        |                        |                        |                        |                        |                        |                        |                        |
| Frequency of socializing               |                        |                        |                        |                        |                        |                        |                        |                        |
| Low                                    | 1                      | 1                      | 1                      | 1                      | 1                      | 1                      | 1                      | 1                      |
| High                                   | 1.11<br>(0.92,1.34)    | 1.25*<br>(1.05,1.47)   | 1.36***<br>(1.17,1.59) | 1.54***<br>(1.33,1.79) | 1.34***<br>(1.17,1.54) | 1.18**<br>(1.04,1.34)  | 1.23**<br>(1.06,1.43)  | 1.17*<br>(1.01,1.35)   |
| Civic participation                    |                        |                        |                        |                        |                        |                        |                        |                        |
| No                                     | 1                      | 1                      | 1                      | 1                      | 1                      | 1                      | 1                      | 1                      |
| Yes                                    | 0.89                   | 1.00                   | 1.03                   | 0.89                   | 1.02                   | 1.04                   | 1.29***                | 1.13                   |

|                                   |             |             |             |             |             |             |             |             |
|-----------------------------------|-------------|-------------|-------------|-------------|-------------|-------------|-------------|-------------|
|                                   | (0.77,1.04) | (0.86,1.15) | (0.89,1.21) | (0.76,1.03) | (0.90,1.16) | (0.92,1.18) | (1.12,1.48) | (0.99,1.30) |
| Trust                             |             |             |             |             |             |             |             |             |
| Low                               | 1           | 1           | 1           | 1           | 1           | 1           | 1           | 1           |
| High                              | 1.43***     | 1.36***     | 1.21**      | 1.58***     | 1.47***     | 1.48***     | 1.48***     | 1.33***     |
|                                   | (1.23,1.66) | (1.18,1.57) | (1.05,1.41) | (1.37,1.83) | (1.31,1.65) | (1.32,1.65) | (1.31,1.67) | (1.17,1.50) |
| County-level social capital       |             |             |             |             |             |             |             |             |
| Frequency of socializing (%)      | 0.99        | 1.00        | 1.00        | 1.02**      | 0.99        | 1.00        | 1.00        | 1.00        |
|                                   | (0.97,1.01) | (0.99,1.02) | (0.98,1.01) | (1.01,1.03) | (0.98,1.01) | (0.99,1.01) | (0.99,1.01) | (0.99,1.02) |
| Civic participation (%)           | 1.01        | 1.01        | 1.00        | 1.00        | 1.01        | 1.01        | 1.00        | 1.00        |
|                                   | (1.00,1.02) | (1.00,1.02) | (0.99,1.02) | (0.99,1.01) | (1.00,1.02) | (1.00,1.02) | (0.99,1.02) | (0.99,1.01) |
| Trust (%)                         | 0.99        | 1.01        | 1.00        | 1.00        | 0.99        | 1.01*       | 0.99        | 1.00        |
|                                   | (0.97,1.01) | (0.99,1.02) | (0.98,1.02) | (0.98,1.03) | (0.98,1.00) | (1.00,1.02) | (0.98,1.01) | (0.99,1.02) |
| <i>N of individuals</i>           | 4,370       | 4,477       | 4,267       | 4,317       | 6,457       | 6,627       | 6,396       | 5,918       |
| <i>N of counties</i> <sup>#</sup> | 89          | 87          | 86          | 87          | 129         | 125         | 121         | 124         |
| <i>ICC</i>                        | 0.084       | 0.077       | 0.106       | 0.072       | 0.054       | 0.060       | 0.130       | 0.053       |

\* p < 0.05, \*\* p < 0.01, \*\*\* p < 0.001

<sup>#</sup> One county (i.e., county-level administrative unit) could include both rural and urban samples. Hence, the total number of counties in our study is not equal to the sum of the number of counties in rural samples and the number of counties in urban samples.

**Supplementary Table 5. Associations of individual- and county-level social capital, national GDP, and annually national GDP growth with physical health and mental health, pooled data from 2010–2015 (Multi-level binary logistic model, with “poor” physical health and “poor” mental health as references)**

|                                   | Two-level models without GDP               |                                          | Three-level models with GDP and GDP growth |                                          | Two-level models with GDP and GDP Growth at Level-1 <sup>#</sup> |                                          |
|-----------------------------------|--------------------------------------------|------------------------------------------|--------------------------------------------|------------------------------------------|------------------------------------------------------------------|------------------------------------------|
|                                   | Physical health<br>Adjusted OR<br>(95% CI) | Mental health<br>Adjusted OR<br>(95% CI) | Physical health<br>Adjusted OR<br>(95% CI) | Mental health<br>Adjusted OR<br>(95% CI) | Physical health<br>Adjusted OR<br>(95% CI)                       | Mental health<br>Adjusted OR<br>(95% CI) |
| <b>Sociodemographic factors</b>   |                                            |                                          |                                            |                                          |                                                                  |                                          |
| Gender                            |                                            |                                          |                                            |                                          |                                                                  |                                          |
| Female                            | 1                                          | 1                                        | 1                                          | 1                                        | 1                                                                | 1                                        |
| Male                              | 1.28***<br>(1.23,1.34)                     | 1.23***<br>(1.18,1.28)                   | 1.28***<br>(1.23,1.34)                     | 1.23***<br>(1.18,1.29)                   | 1.28***<br>(1.24,1.33)                                           | 1.23***<br>(1.15,1.32)                   |
| Age                               | 0.96***<br>(0.96,0.96)                     | 0.99***<br>(0.99,0.99)                   | 0.96***<br>(0.96,0.96)                     | 0.99***<br>(0.99,0.99)                   | 0.96***<br>(0.96,0.96)                                           | 0.99***<br>(0.99,0.99)                   |
| Ethnicity                         |                                            |                                          |                                            |                                          |                                                                  |                                          |
| Non-Han                           | 1                                          | 1                                        | 1                                          | 1                                        | 1                                                                | 1                                        |
| Han                               | 0.98<br>(0.89,1.09)                        | 0.95<br>(0.86,1.05)                      | 0.98<br>(0.89,1.09)                        | 0.96<br>(0.87,1.07)                      | 0.98<br>(0.90,1.07)                                              | 0.96<br>(0.88,1.05)                      |
| Marriage                          |                                            |                                          |                                            |                                          |                                                                  |                                          |
| Single/separated/divorced/widowed | 1                                          | 1                                        | 1                                          | 1                                        | 1                                                                | 1                                        |
| Cohabit/married                   | 0.95<br>(0.90,1.01)                        | 1.23***<br>(1.17,1.30)                   | 0.96<br>(0.91,1.02)                        | 1.24***<br>(1.17,1.31)                   | 0.96<br>(0.91,1.02)                                              | 1.24***<br>(1.20,1.28)                   |
| <b>Socioeconomic factors</b>      |                                            |                                          |                                            |                                          |                                                                  |                                          |
| Education                         |                                            |                                          |                                            |                                          |                                                                  |                                          |
| Primary school or below           | 1                                          | 1                                        | 1                                          | 1                                        | 1                                                                | 1                                        |
| Junior secondary school           | 1.18***                                    | 1.27***                                  | 1.19***                                    | 1.27***                                  | 1.19***                                                          | 1.27***                                  |

|                                        |             |             |             |             |             |             |
|----------------------------------------|-------------|-------------|-------------|-------------|-------------|-------------|
|                                        | (1.11,1.25) | (1.19,1.34) | (1.13,1.26) | (1.20,1.35) | (1.13,1.25) | (1.22,1.33) |
| Senior secondary school or equal       | 1.38***     | 1.47***     | 1.40***     | 1.48***     | 1.40***     | 1.48***     |
|                                        | (1.29,1.48) | (1.37,1.58) | (1.30,1.50) | (1.38,1.59) | (1.32,1.47) | (1.38,1.59) |
| College or above                       | 1.48***     | 1.53***     | 1.53***     | 1.56***     | 1.53***     | 1.56***     |
|                                        | (1.35,1.62) | (1.40,1.67) | (1.40,1.68) | (1.43,1.71) | (1.45,1.62) | (1.48,1.64) |
| Poverty                                |             |             |             |             |             |             |
| Poor                                   | 1           | 1           | 1           | 1           | 1           | 1           |
| Non-poor                               | 1.62***     | 1.68***     | 1.62***     | 1.71***     | 1.62***     | 1.71***     |
|                                        | (1.52,1.73) | (1.58,1.79) | (1.52,1.73) | (1.61,1.82) | (1.56,1.68) | (1.60,1.83) |
| Do not know income                     | 1.43***     | 1.52***     | 1.44***     | 1.51***     | 1.45***     | 1.51***     |
|                                        | (1.29,1.58) | (1.38,1.67) | (1.30,1.60) | (1.36,1.66) | (1.36,1.55) | (1.30,1.75) |
| Occupation                             |             |             |             |             |             |             |
| Skill level 3 or 4                     | 1           | 1           | 1           | 1           | 1           | 1           |
| Skill level 2                          | 0.94        | 1.08        | 0.94        | 1.06        | 0.94***     | 1.06        |
|                                        | (0.87,1.03) | (0.99,1.17) | (0.86,1.02) | (0.97,1.16) | (0.90,0.97) | (0.98,1.15) |
| Skill level 1                          | 1.02        | 1.07        | 1.01        | 1.08        | 1.01        | 1.08*       |
|                                        | (0.88,1.17) | (0.93,1.23) | (0.87,1.16) | (0.94,1.24) | (0.87,1.16) | (1.01,1.15) |
| Non-employed                           | 0.72***     | 0.99        | 0.71***     | 0.99        | 0.71***     | 0.99        |
|                                        | (0.65,0.78) | (0.91,1.08) | (0.64,0.77) | (0.90,1.08) | (0.64,0.78) | (0.92,1.05) |
| Place of residence                     |             |             |             |             |             |             |
| Rural                                  | 1           | 1           | 1           | 1           | 1           | 1           |
| Urban                                  | 1.20***     | 1.06*       | 1.20***     | 1.07*       | 1.20***     | 1.07*       |
|                                        | (1.13,1.27) | (1.00,1.12) | (1.13,1.27) | (1.01,1.13) | (1.09,1.31) | (1.00,1.15) |
| <b>Individual-level social capital</b> |             |             |             |             |             |             |
| Frequency of socializing               |             |             |             |             |             |             |
| Low                                    | 1           | 1           | 1           | 1           | 1           | 1           |

|                                             |                        |                        |                        |                        |                        |                        |
|---------------------------------------------|------------------------|------------------------|------------------------|------------------------|------------------------|------------------------|
| High                                        | 1.34***<br>(1.27,1.41) | 1.27***<br>(1.21,1.33) | 1.37***<br>(1.30,1.44) | 1.28***<br>(1.22,1.35) | 1.37***<br>(1.29,1.44) | 1.28***<br>(1.22,1.35) |
| Civic participation                         |                        |                        |                        |                        |                        |                        |
| No                                          | 1                      | 1                      | 1                      | 1                      | 1                      | 1                      |
| Yes                                         | 1.00<br>(0.95,1.05)    | 1.04<br>(0.99,1.09)    | 1.01<br>(0.96,1.06)    | 1.05<br>(1.00,1.10)    | 1.01<br>(1.00,1.02)    | 1.05<br>(0.98,1.12)    |
| Trust                                       |                        |                        |                        |                        |                        |                        |
| Low                                         | 1                      | 1                      | 1                      | 1                      | 1                      | 1                      |
| High                                        | 1.29***<br>(1.23,1.35) | 1.39***<br>(1.33,1.46) | 1.31***<br>(1.25,1.37) | 1.42***<br>(1.36,1.49) | 1.31***<br>(1.23,1.39) | 1.42***<br>(1.37,1.46) |
| <b>County-level social capital</b>          |                        |                        |                        |                        |                        |                        |
| Frequency of socializing (%)                | 1.01***<br>(1.00,1.01) | 1.01***<br>(1.00,1.01) | 1.00<br>(1.00,1.01)    | 1.00<br>(0.99,1.01)    | 1.00<br>(1.00,1.01)    | 1.00<br>(1.00,1.00)    |
| Civic participation (%)                     | 0.99***<br>(0.99,1.00) | 1.00<br>(1.00,1.00)    | 0.99**<br>(0.99,1.00)  | 1.00<br>(1.00,1.01)    | 0.99***<br>(0.99,1.00) | 1.00<br>(1.00,1.01)    |
| Trust (%)                                   | 1.00<br>(1.00,1.01)    | 1.00<br>(1.00,1.01)    | 1.01*<br>(1.00,1.01)   | 1.00<br>(0.99,1.01)    | 1.01**<br>(1.00,1.01)  | 1.00<br>(0.99,1.01)    |
| <b>Year</b>                                 |                        |                        |                        |                        |                        |                        |
| <b>National GDP</b> (trillion <i>yuan</i> ) | --                     | --                     | 1.03<br>(0.99,1.06)    | 1.01<br>(0.98,1.04)    | 1.03<br>(1.00,1.06)    | 1.01<br>(0.98,1.04)    |
| <b>Annually National GDP Growth</b> (%)     | --                     | --                     | 1.13<br>(0.87,1.46)    | 1.02<br>(0.81,1.30)    | 1.13<br>(0.94,1.36)    | 1.03<br>(0.87,1.22)    |
| <i>N of individuals</i>                     | 42,829                 | 42,829                 | 42,829                 | 42,829                 | 42,829                 | 42,829                 |
| <i>N of counties</i>                        | 520                    | 520                    | 520                    | 520                    | 520                    | 520                    |
| <i>N of years</i>                           | --                     | --                     | 4                      | 4                      | --                     | --                     |
| <i>ICC (At year level)</i>                  | --                     | --                     | 0.003                  | 0.003                  | --                     | --                     |

|                       |       |       |       |       |       |       |
|-----------------------|-------|-------|-------|-------|-------|-------|
| ICC (At county level) | 0.041 | 0.040 | 0.079 | 0.080 | 0.078 | 0.080 |
|-----------------------|-------|-------|-------|-------|-------|-------|

\*  $p < 0.05$ , \*\*  $p < 0.01$ , \*\*\*  $p < 0.001$ ; 1 trillion *yuan*  $\approx$  141 billion US\$

# As ICCs at the year level were too small in the previous three-level models, we treat National GDP and Annually National GDP Growth as Level 1 factors. We calculated 95%CI based on the standard errors clustered on the year level given that observations within each year might not be independent with each other.

Supplementary Table 6. Interaction effects between social capital indicators and survey year on physical health, pooled data from 2010-2015 (Two-level binary logistic model, with “poor” physical health as references)

|                                      | Adjusted OR<br>(95% CI) |
|--------------------------------------|-------------------------|-------------------------|-------------------------|-------------------------|-------------------------|-------------------------|
| Interaction term                     |                         |                         |                         |                         |                         |                         |
| Individual-level social capital      |                         |                         |                         |                         |                         |                         |
| High frequency of socializing × 2010 | 1                       | --                      | --                      | --                      | --                      | --                      |
| High frequency of socializing × 2012 | 0.95<br>(0.82,1.10)     | --                      | --                      | --                      | --                      | --                      |
| High frequency of socializing × 2013 | 0.88<br>(0.76,1.01)     | --                      | --                      | --                      | --                      | --                      |
| High frequency of socializing × 2015 | 1.01<br>(0.87,1.16)     | --                      | --                      | --                      | --                      | --                      |
| Civic participation (Yes) × 2010     | --                      | 1                       | --                      | --                      | --                      | --                      |
| Civic participation (Yes) × 2012     | --                      | 0.93<br>(0.83,1.05)     | --                      | --                      | --                      | --                      |
| Civic participation (Yes) × 2013     | --                      | 0.91<br>(0.81,1.03)     | --                      | --                      | --                      | --                      |
| Civic participation (Yes) × 2015     | --                      | 0.91<br>(0.81,1.03)     | --                      | --                      | --                      | --                      |
| High trust × 2010                    |                         |                         | 1                       | --                      | --                      | --                      |
| High trust × 2012                    | --                      | --                      | 0.98<br>(0.87,1.11)     | --                      | --                      | --                      |
| High trust × 2013                    | --                      | --                      | 0.90<br>(0.79,1.02)     | --                      | --                      | --                      |
| High trust × 2015                    | --                      | --                      | 1.08                    | --                      | --                      | --                      |

|                                      |        |        |        |                        |                      |                     |
|--------------------------------------|--------|--------|--------|------------------------|----------------------|---------------------|
|                                      |        |        |        | (0.95,1.22)            |                      |                     |
| <b>County-level social capital</b>   |        |        |        |                        |                      |                     |
| High frequency of socializing × 2010 | --     | --     | --     | 1                      | --                   | --                  |
| High frequency of socializing × 2012 | --     | --     | --     | 1.00<br>(0.99,1.01)    | --                   | --                  |
| High frequency of socializing × 2013 | --     | --     | --     | 1.01<br>(1.00,1.01)    | --                   | --                  |
| High frequency of socializing × 2015 | --     | --     | --     | 1.02***<br>(1.01,1.03) | --                   | --                  |
| Civic participation (Yes) × 2010     | --     | --     | --     | --                     | 1                    | --                  |
| Civic participation (Yes) × 2012     | --     | --     | --     | --                     | 0.99*<br>(0.99,1.00) | --                  |
| Civic participation (Yes) × 2013     | --     | --     | --     | --                     | 1.00<br>(0.99,1.00)  | --                  |
| Civic participation (Yes) × 2015     | --     | --     | --     | --                     | 1.00<br>(0.99,1.00)  | --                  |
| High trust × 2010                    | --     | --     | --     | --                     | --                   | 1                   |
| High trust × 2012                    | --     | --     | --     | --                     | --                   | 1.00<br>(0.99,1.01) |
| High trust × 2013                    | --     | --     | --     | --                     | --                   | 1.00<br>(0.99,1.01) |
| High trust × 2015                    | --     | --     | --     | --                     | --                   | 1.00<br>(0.99,1.01) |
| <i>N of individuals</i>              | 42,829 | 42,829 | 42,829 | 42,829                 | 42,829               | 42,829              |
| <i>ICC</i>                           | 0.043  | 0.043  | 0.043  | 0.043                  | 0.043                | 0.043               |

\* p < 0.05, \*\* p < 0.01, \*\*\* p < 0.001; Year and all other variables in Table 2 and Table 3 are adjusted.

Supplementary Table 7. Interaction effects between social capital indicators and survey year on mental health, pooled data from 2010-2015 (Two-level binary logistic model, with “poor” mental health as references)

|                                      | Adjusted OR<br>(95% CI) |
|--------------------------------------|-------------------------|-------------------------|-------------------------|-------------------------|-------------------------|-------------------------|
| Interaction term                     |                         |                         |                         |                         |                         |                         |
| Individual-level social capital      |                         |                         |                         |                         |                         |                         |
| High frequency of socializing × 2010 | 1                       | --                      | --                      | --                      | --                      | --                      |
| High frequency of socializing × 2012 | 0.93<br>(0.81,1.08)     | --                      | --                      | --                      | --                      | --                      |
| High frequency of socializing × 2013 | 1.03<br>(0.89,1.19)     | --                      | --                      | --                      | --                      | --                      |
| High frequency of socializing × 2015 | 1.10<br>(0.95,1.27)     | --                      | --                      | --                      | --                      | --                      |
| Civic participation (Yes) × 2010     | --                      | 1                       | --                      | --                      | --                      | --                      |
| Civic participation (Yes) × 2012     | --                      | 1.09<br>(0.97,1.22)     | --                      | --                      | --                      | --                      |
| Civic participation (Yes) × 2013     | --                      | 1.13<br>(1.00,1.27)     | --                      | --                      | --                      | --                      |
| Civic participation (Yes) × 2015     | --                      | 1.02<br>(0.90,1.15)     | --                      | --                      | --                      | --                      |
| High trust × 2010                    | --                      | --                      | 1                       | --                      | --                      | --                      |
| High trust × 2012                    | --                      | --                      | 1.04<br>(0.92,1.17)     | --                      | --                      | --                      |
| High trust × 2013                    | --                      | --                      | 0.96<br>(0.85,1.08)     | --                      | --                      | --                      |
| High trust × 2015                    | --                      | --                      | 1.02                    | --                      | --                      | --                      |

|                                      |        |        |        |                        |                      |                        |
|--------------------------------------|--------|--------|--------|------------------------|----------------------|------------------------|
|                                      |        |        |        | (0.90,1.16)            |                      |                        |
| <i>County-level social capital</i>   |        |        |        |                        |                      |                        |
| High frequency of socializing × 2010 | --     | --     | --     | 1                      | --                   | --                     |
| High frequency of socializing × 2012 | --     | --     | --     | 1.01<br>(1.00,1.02)    | --                   | --                     |
| High frequency of socializing × 2013 | --     | --     | --     | 1.01<br>(1.00,1.01)    | --                   | --                     |
| High frequency of socializing × 2015 | --     | --     | --     | 1.02***<br>(1.01,1.03) | --                   | --                     |
| Civic participation (Yes) × 2010     | --     | --     | --     | --                     | 1                    | --                     |
| Civic participation (Yes) × 2012     | --     | --     | --     | --                     | 1.00<br>(0.99,1.00)  | --                     |
| Civic participation (Yes) × 2013     | --     | --     | --     | --                     | 0.99*<br>(0.99,1.00) | --                     |
| Civic participation (Yes) × 2015     | --     | --     | --     | --                     | 1.00<br>(0.99,1.00)  | --                     |
| High trust × 2010                    | --     | --     | --     | --                     | --                   | 1                      |
| High trust × 2012                    | --     | --     | --     | --                     | --                   | 1.01***<br>(1.01,1.02) |
| High trust × 2013                    | --     | --     | --     | --                     | --                   | 1.01*<br>(1.00,1.02)   |
| High trust × 2015                    | --     | --     | --     | --                     | --                   | 1.01<br>(1.00,1.02)    |
| <i>N of individuals</i>              | 42,829 | 42,829 | 42,829 | 42,829                 | 42,829               | 42,829                 |
| <i>ICC</i>                           | 0.040  | 0.040  | 0.040  | 0.040                  | 0.040                | 0.040                  |

\* p < 0.05, \*\* p < 0.01, \*\*\* p < 0.001; Year and all other variables in Table 2 and Table 3 are adjusted.

**Supplementary Table 8. Associations of individual- and county-level social capital with physical health, 2010-2015, based on weighted data (Two-level binary logistic model, with “poor” physical health as the reference group)**

|                                   | 2010                    | 2012                    | 2013                    | 2015                    |
|-----------------------------------|-------------------------|-------------------------|-------------------------|-------------------------|
|                                   | Adjusted OR<br>(95% CI) | Adjusted OR<br>(95% CI) | Adjusted OR<br>(95% CI) | Adjusted OR<br>(95% CI) |
| <b>Sociodemographic factors</b>   |                         |                         |                         |                         |
| Gender                            |                         |                         |                         |                         |
| Female                            | 1                       | 1                       | 1                       | 1                       |
| Male                              | 1.24**<br>(1.08,1.43)   | 1.38***<br>(1.23,1.55)  | 1.14*<br>(1.02,1.28)    | 1.29***<br>(1.14,1.46)  |
| Age                               | 0.96***<br>(0.95,0.96)  | 0.96***<br>(0.95,0.96)  | 0.96***<br>(0.96,0.97)  | 0.96***<br>(0.96,0.96)  |
| Ethnicity                         |                         |                         |                         |                         |
| Non-Han                           | 1                       | 1                       | 1                       | 1                       |
| Han                               | 0.86<br>(0.73,1.01)     | 0.92<br>(0.73,1.15)     | 0.91<br>(0.65,1.26)     | 0.97<br>(0.76,1.25)     |
| Marriage                          |                         |                         |                         |                         |
| Single/separated/divorced/widowed | 1                       | 1                       | 1                       | 1                       |
| Cohabit/married                   | 0.92<br>(0.80,1.04)     | 0.95<br>(0.78,1.15)     | 1.10<br>(0.92,1.32)     | 0.92<br>(0.80,1.07)     |
| <b>Socioeconomic factors</b>      |                         |                         |                         |                         |
| Education                         |                         |                         |                         |                         |
| Primary school or below           | 1                       | 1                       | 1                       | 1                       |
| Junior secondary school           | 1.33***<br>(1.15,1.53)  | 1.25**<br>(1.09,1.43)   | 1.48***<br>(1.22,1.79)  | 1.29**<br>(1.09,1.53)   |
| Senior secondary school or equal  | 1.40***<br>(1.18,1.67)  | 1.55***<br>(1.30,1.83)  | 1.74***<br>(1.42,2.13)  | 1.65***<br>(1.37,1.98)  |
| College or above                  | 1.61***<br>(1.30,2.00)  | 1.63***<br>(1.27,2.08)  | 2.09***<br>(1.64,2.66)  | 1.92***<br>(1.53,2.42)  |
| Poverty                           |                         |                         |                         |                         |
| Poor                              | 1                       | 1                       | 1                       | 1                       |
| Non-poor                          | 1.66***<br>(1.39,1.97)  | 1.54***<br>(1.31,1.81)  | 1.57***<br>(1.33,1.87)  | 1.59***<br>(1.34,1.88)  |
| Do not know income                | 1.60***<br>(1.24,2.07)  | 1.55***<br>(1.23,1.95)  | 1.55***<br>(1.22,1.96)  | 1.24<br>(0.91,1.68)     |
| Occupation                        |                         |                         |                         |                         |
| Skill level 3 or 4                | 1                       | 1                       | 1                       | 1                       |
| Skill level 2                     | 0.87<br>(0.70,1.07)     | 0.83<br>(0.64,1.07)     | 0.81<br>(0.64,1.02)     | 1.03<br>(0.81,1.30)     |
| Skill level 1                     | 1.37<br>(0.94,1.99)     | 0.79<br>(0.54,1.17)     | 0.99<br>(0.74,1.33)     | 1.03<br>(0.73,1.47)     |
| Non-employed                      | 0.69**<br>(0.55,0.87)   | 0.74**<br>(0.59,0.93)   | 0.62***<br>(0.50,0.77)  | 0.89<br>(0.70,1.13)     |

|                                        |             |             |             |             |
|----------------------------------------|-------------|-------------|-------------|-------------|
| Place of residence                     |             |             |             |             |
| Rural                                  | 1           | 1           | 1           | 1           |
| Urban                                  | 1.01        | 1.10        | 1.15        | 1.18*       |
|                                        | (0.86,1.19) | (0.96,1.24) | (0.99,1.33) | (1.01,1.38) |
| <b>Individual-level social capital</b> |             |             |             |             |
| Frequency of socializing               |             |             |             |             |
| Low                                    | 1           | 1           | 1           | 1           |
| High                                   | 1.48***     | 1.40***     | 1.17*       | 1.26**      |
|                                        | (1.29,1.70) | (1.24,1.59) | (1.03,1.33) | (1.08,1.48) |
| Civic participation                    |             |             |             |             |
| No                                     | 1           | 1           | 1           | 1           |
| Yes                                    | 0.96        | 1.10        | 0.97        | 0.97        |
|                                        | (0.84,1.10) | (0.96,1.25) | (0.85,1.10) | (0.85,1.11) |
| Trust <sup>#</sup>                     |             |             |             |             |
| Low                                    | 1           | 1           | 1           | 1           |
| High                                   | 1.35***     | 1.32***     | 1.14        | 1.46***     |
|                                        | (1.21,1.52) | (1.17,1.48) | (0.99,1.30) | (1.28,1.67) |
| <b>County-level social capital</b>     |             |             |             |             |
| Frequency of socializing (%)           |             |             |             |             |
|                                        | 0.98*       | 1.01        | 1.00        | 1.02***     |
|                                        | (0.96,1.00) | (1.00,1.02) | (0.99,1.02) | (1.01,1.03) |
| Civic participation (%)                |             |             |             |             |
|                                        | 1.00        | 1.00        | 0.99        | 0.99        |
|                                        | (0.99,1.01) | (0.99,1.01) | (0.98,1.01) | (0.99,1.00) |
| Trust (%)                              |             |             |             |             |
|                                        | 0.99        | 1.01        | 1.01        | 1.01        |
|                                        | (0.97,1.01) | (0.99,1.02) | (1.00,1.03) | (1.00,1.03) |
| <i>N of individuals</i>                | 10,827      | 11,104      | 10,663      | 10,235      |
| <i>N of counties</i>                   | 133         | 131         | 126         | 130         |
| <i>ICC</i>                             | 0.096       | 0.059       | 0.093       | 0.043       |

\* p &lt; 0.05, \*\* p &lt; 0.01, \*\*\* p &lt; 0.001

<sup>#</sup> p = 0.063 in 2013

**Supplementary Table 9. Associations of individual- and county-level social capital with mental health, 2010-2015, based on weighted data (Two-level binary logistic model, with “poor” mental health as the reference group)**

|                                   | 2010     |             | 2012     |             | 2013     |             | 2015     |             |
|-----------------------------------|----------|-------------|----------|-------------|----------|-------------|----------|-------------|
|                                   | Adjusted | OR          | Adjusted | OR          | Adjusted | OR          | Adjusted | OR          |
|                                   | (95% CI) |             | (95% CI) |             | (95% CI) |             | (95% CI) |             |
| Sociodemographic factors          |          |             |          |             |          |             |          |             |
| Gender                            |          |             |          |             |          |             |          |             |
| Female                            |          | 1           |          | 1           |          | 1           |          | 1           |
| Male                              |          | 1.22***     |          | 1.48***     |          | 1.04        |          | 1.30***     |
|                                   |          | (1.09,1.38) |          | (1.33,1.65) |          | (0.91,1.18) |          | (1.15,1.45) |
| Age                               |          | 0.98***     |          | 0.98***     |          | 0.99***     |          | 0.99***     |
|                                   |          | (0.98,0.99) |          | (0.98,0.99) |          | (0.98,0.99) |          | (0.99,1.00) |
| Ethnicity                         |          |             |          |             |          |             |          |             |
| Non-Han                           |          | 1           |          | 1           |          | 1           |          | 1           |
| Han                               |          | 0.80*       |          | 0.98        |          | 0.93        |          | 0.93        |
|                                   |          | (0.66,0.98) |          | (0.79,1.21) |          | (0.68,1.28) |          | (0.74,1.15) |
| Marriage                          |          |             |          |             |          |             |          |             |
| Single/separated/divorced/widowed |          | 1           |          | 1           |          | 1           |          | 1           |
| Cohabit/married                   |          | 1.23**      |          | 1.16        |          | 1.47***     |          | 1.32***     |
|                                   |          | (1.06,1.43) |          | (0.99,1.35) |          | (1.24,1.73) |          | (1.12,1.55) |
| Socioeconomic factors             |          |             |          |             |          |             |          |             |
| Education                         |          |             |          |             |          |             |          |             |
| Primary school or below           |          | 1           |          | 1           |          | 1           |          | 1           |
| Junior secondary school           |          | 1.34***     |          | 1.23**      |          | 1.41***     |          | 1.31***     |
|                                   |          | (1.17,1.53) |          | (1.05,1.42) |          | (1.16,1.71) |          | (1.12,1.54) |
| Senior secondary school or equal  |          | 1.33**      |          | 1.62***     |          | 1.57**      |          | 1.65***     |
|                                   |          | (1.11,1.59) |          | (1.34,1.96) |          | (1.15,2.14) |          | (1.34,2.03) |
| College or above                  |          | 1.43**      |          | 1.45***     |          | 2.02***     |          | 1.94***     |
|                                   |          | (1.12,1.81) |          | (1.17,1.80) |          | (1.47,2.77) |          | (1.51,2.48) |
| Poverty                           |          |             |          |             |          |             |          |             |
| Poor                              |          | 1           |          | 1           |          | 1           |          | 1           |
| Non-poor                          |          | 1.71***     |          | 1.58***     |          | 1.65***     |          | 1.55***     |
|                                   |          | (1.47,2.00) |          | (1.37,1.81) |          | (1.41,1.94) |          | (1.33,1.81) |
| Do not know income                |          | 1.92***     |          | 1.39**      |          | 1.34*       |          | 1.46*       |
|                                   |          | (1.48,2.50) |          | (1.10,1.77) |          | (1.07,1.67) |          | (1.09,1.95) |
| Occupation                        |          |             |          |             |          |             |          |             |
| Skill level 3 or 4                |          | 1           |          | 1           |          | 1           |          | 1           |
| Skill level 2                     |          | 0.98        |          | 0.88        |          | 1.17        |          | 1.31*       |
|                                   |          | (0.78,1.24) |          | (0.70,1.10) |          | (0.87,1.56) |          | (1.01,1.69) |
| Skill level 1                     |          | 0.94        |          | 0.65*       |          | 1.28        |          | 1.54        |
|                                   |          | (0.66,1.34) |          | (0.46,0.92) |          | (0.81,2.03) |          | (0.98,2.42) |
| Non-employed                      |          | 0.94        |          | 0.95        |          | 1.10        |          | 1.20        |
|                                   |          | (0.75,1.18) |          | (0.76,1.20) |          | (0.80,1.50) |          | (0.92,1.55) |

|                                        |             |             |             |             |
|----------------------------------------|-------------|-------------|-------------|-------------|
| Place of residence                     |             |             |             |             |
| Rural                                  | 1           | 1           | 1           | 1           |
| Urban                                  | 1.04        | 0.92        | 0.97        | 1.06        |
|                                        | (0.90,1.19) | (0.79,1.06) | (0.84,1.12) | (0.93,1.22) |
| <b>Individual-level social capital</b> |             |             |             |             |
| Frequency of socializing <sup>#</sup>  |             |             |             |             |
| Low                                    | 1           | 1           | 1           | 1           |
| High                                   | 1.19        | 1.14*       | 1.29***     | 1.36***     |
|                                        | (1.00,1.42) | (1.00,1.31) | (1.14,1.46) | (1.17,1.59) |
| Civic participation                    |             |             |             |             |
| No                                     | 1           | 1           | 1           | 1           |
| Yes                                    | 0.96        | 0.95        | 1.10        | 0.93        |
|                                        | (0.85,1.08) | (0.84,1.07) | (0.95,1.27) | (0.81,1.08) |
| Trust                                  |             |             |             |             |
| Low                                    | 1           | 1           | 1           | 1           |
| High                                   | 1.43***     | 1.40***     | 1.27***     | 1.34***     |
|                                        | (1.28,1.59) | (1.24,1.57) | (1.12,1.46) | (1.20,1.49) |
| <b>County-level social capital</b>     |             |             |             |             |
| Frequency of socializing (%)           |             |             |             |             |
|                                        | 0.99        | 1.01*       | 1.00        | 1.01*       |
|                                        | (0.97,1.01) | (1.00,1.02) | (0.99,1.01) | (1.00,1.03) |
| Civic participation (%)                |             |             |             |             |
|                                        | 1.01        | 1.01        | 1.00        | 1.00        |
|                                        | (1.00,1.01) | (1.00,1.02) | (0.99,1.01) | (0.99,1.01) |
| Trust (%)                              |             |             |             |             |
|                                        | 0.98*       | 1.01*       | 1.00        | 1.00        |
|                                        | (0.97,1.00) | (1.00,1.02) | (0.98,1.02) | (0.99,1.02) |
| <i>N of individuals</i>                | 10,827      | 11,104      | 10,663      | 10,235      |
| <i>N of counties</i>                   | 133         | 131         | 126         | 130         |
| <i>ICC</i>                             | 0.064       | 0.055       | 0.100       | 0.053       |

\* p &lt; 0.05, \*\* p &lt; 0.01, \*\*\* p &lt; 0.001

<sup>#</sup> p = 0.053 in 2010

**Supplementary Table 10. Sensitivity analysis on associations of individual- and county-level social capital with physical health, 2010-2015 (Two-level ordinal logistic model)**

|                                   | 2010                    | 2012                    | 2013                    | 2015                    |
|-----------------------------------|-------------------------|-------------------------|-------------------------|-------------------------|
|                                   | Adjusted OR<br>(95% CI) | Adjusted OR<br>(95% CI) | Adjusted OR<br>(95% CI) | Adjusted OR<br>(95% CI) |
| <b>Sociodemographic factors</b>   |                         |                         |                         |                         |
| Gender                            |                         |                         |                         |                         |
| Female                            | 1                       | 1                       | 1                       | 1                       |
| Male                              | 1.31***<br>(1.22,1.41)  | 1.38***<br>(1.29,1.49)  | 1.25***<br>(1.16,1.34)  | 1.29***<br>(1.20,1.39)  |
| Age                               | 0.96***<br>(0.96,0.96)  | 0.96***<br>(0.96,0.96)  | 0.96***<br>(0.96,0.96)  | 0.96***<br>(0.96,0.96)  |
| Ethnicity                         |                         |                         |                         |                         |
| Non-Han                           | 1                       | 1                       | 1                       | 1                       |
| Han                               | 0.89<br>(0.76,1.05)     | 1.01<br>(0.86,1.19)     | 0.94<br>(0.80,1.12)     | 1.08<br>(0.90,1.28)     |
| Marriage                          |                         |                         |                         |                         |
| Single/separated/divorced/widowed | 1                       | 1                       | 1                       | 1                       |
| Cohabit/married                   | 1.00<br>(0.91,1.10)     | 0.96<br>(0.88,1.05)     | 1.00<br>(0.91,1.10)     | 0.94<br>(0.86,1.03)     |
| <b>Socioeconomic factors</b>      |                         |                         |                         |                         |
| Education                         |                         |                         |                         |                         |
| Primary school or below           | 1                       | 1                       | 1                       | 1                       |
| Junior secondary school           | 1.31***<br>(1.19,1.45)  | 1.22***<br>(1.11,1.35)  | 1.29***<br>(1.17,1.43)  | 1.19***<br>(1.07,1.31)  |
| Senior secondary school or equal  | 1.43***<br>(1.27,1.61)  | 1.39***<br>(1.23,1.56)  | 1.52***<br>(1.35,1.71)  | 1.44***<br>(1.27,1.62)  |
| College or above                  | 1.36***<br>(1.17,1.57)  | 1.44***<br>(1.25,1.66)  | 1.45***<br>(1.26,1.68)  | 1.43***<br>(1.23,1.66)  |
| Poverty                           |                         |                         |                         |                         |
| Poor                              | 1                       | 1                       | 1                       | 1                       |
| Non-poor                          | 1.85***<br>(1.64,2.09)  | 1.70***<br>(1.53,1.90)  | 1.82***<br>(1.63,2.04)  | 1.66***<br>(1.49,1.85)  |
| Do not know income                | 1.76***<br>(1.47,2.11)  | 1.54***<br>(1.30,1.81)  | 1.61***<br>(1.37,1.90)  | 1.36**<br>(1.13,1.64)   |
| Occupation                        |                         |                         |                         |                         |
| Skill level 3 or 4                | 1                       | 1                       | 1                       | 1                       |
| Skill level 2                     | 0.95<br>(0.83,1.08)     | 0.97<br>(0.85,1.10)     | 0.99<br>(0.87,1.12)     | 1.05<br>(0.91,1.22)     |
| Skill level 1                     | 1.11<br>(0.89,1.39)     | 1.06<br>(0.84,1.35)     | 1.08<br>(0.86,1.35)     | 0.99<br>(0.79,1.24)     |
| Non-employed                      | 0.70***<br>(0.61,0.81)  | 0.79***<br>(0.69,0.90)  | 0.76***<br>(0.66,0.87)  | 0.84*<br>(0.73,0.98)    |
| Place of residence                |                         |                         |                         |                         |

|                                        |             |             |             |             |
|----------------------------------------|-------------|-------------|-------------|-------------|
| Rural                                  | 1           | 1           | 1           | 1           |
| Urban                                  | 1.14**      | 1.20***     | 1.22***     | 1.36***     |
|                                        | (1.03,1.26) | (1.09,1.32) | (1.11,1.34) | (1.23,1.50) |
| <b>Individual-level social capital</b> |             |             |             |             |
| Frequency of socializing               |             |             |             |             |
| Low                                    | 1           | 1           | 1           | 1           |
| High                                   | 1.40***     | 1.35***     | 1.29***     | 1.35***     |
|                                        | (1.28,1.53) | (1.25,1.47) | (1.18,1.40) | (1.24,1.46) |
| Civic participation                    |             |             |             |             |
| No                                     | 1           | 1           | 1           | 1           |
| Yes                                    | 0.96        | 1.05        | 1.03        | 1.04        |
|                                        | (0.89,1.04) | (0.97,1.13) | (0.95,1.11) | (0.96,1.13) |
| Trust                                  |             |             |             |             |
| Low                                    | 1           | 1           | 1           | 1           |
| High                                   | 1.24***     | 1.23***     | 1.19***     | 1.28***     |
|                                        | (1.15,1.33) | (1.14,1.33) | (1.11,1.28) | (1.19,1.39) |
| <b>County-level social capital</b>     |             |             |             |             |
| Frequency of socializing (%)           | 0.99        | 1.00        | 1.01*       | 1.01*       |
|                                        | (0.98,1.01) | (0.99,1.01) | (1.00,1.02) | (1.00,1.02) |
| Civic participation (%)                | 1.00        | 1.00        | 0.99        | 1.00        |
|                                        | (0.99,1.01) | (0.99,1.00) | (0.98,1.00) | (0.99,1.00) |
| Trust (%)                              | 1.00        | 1.01        | 1.00        | 1.01        |
|                                        | (0.99,1.01) | (1.00,1.02) | (0.99,1.01) | (1.00,1.02) |
| <i>N of individuals</i>                | 10,827      | 11,104      | 10,663      | 10,235      |
| <i>N of counties</i>                   | 133         | 131         | 126         | 130         |

\* p < 0.05, \*\* p < 0.01, \*\*\* p < 0.001

**Supplementary Table 11. Sensitivity analysis on associations of individual- and county-level social capital with mental health, 2010-2015 (Two-level ordinal logistic model)**

|                                   | 2010                    | 2012                    | 2013                    | 2015                    |
|-----------------------------------|-------------------------|-------------------------|-------------------------|-------------------------|
|                                   | Adjusted OR<br>(95% CI) | Adjusted OR<br>(95% CI) | Adjusted OR<br>(95% CI) | Adjusted OR<br>(95% CI) |
| <b>Sociodemographic factors</b>   |                         |                         |                         |                         |
| Gender                            |                         |                         |                         |                         |
| Female                            | 1                       | 1                       | 1                       | 1                       |
| Male                              | 1.23***<br>(1.14,1.32)  | 1.37***<br>(1.27,1.47)  | 1.17***<br>(1.09,1.26)  | 1.23***<br>(1.14,1.32)  |
| Age                               | 0.99***<br>(0.99,0.99)  | 0.99***<br>(0.99,0.99)  | 0.99***<br>(0.99,0.99)  | 0.99***<br>(0.99,0.99)  |
| Ethnicity                         |                         |                         |                         |                         |
| Non-Han                           | 1                       | 1                       | 1                       | 1                       |
| Han                               | 0.81*<br>(0.69,0.96)    | 0.90<br>(0.76,1.07)     | 0.94<br>(0.79,1.11)     | 0.95<br>(0.80,1.14)     |
| Marriage                          |                         |                         |                         |                         |
| Single/separated/divorced/widowed | 1                       | 1                       | 1                       | 1                       |
| Cohabit/married                   | 1.23***<br>(1.12,1.35)  | 1.23***<br>(1.12,1.34)  | 1.21***<br>(1.10,1.33)  | 1.14**<br>(1.04,1.25)   |
| <b>Socioeconomic factors</b>      |                         |                         |                         |                         |
| Education                         |                         |                         |                         |                         |
| Primary school or below           | 1                       | 1                       | 1                       | 1                       |
| Junior secondary school           | 1.35***<br>(1.22,1.49)  | 1.23***<br>(1.11,1.35)  | 1.24***<br>(1.12,1.37)  | 1.31***<br>(1.19,1.45)  |
| Senior secondary school or equal  | 1.42***<br>(1.27,1.60)  | 1.49***<br>(1.33,1.68)  | 1.38***<br>(1.22,1.56)  | 1.51***<br>(1.34,1.71)  |
| College or above                  | 1.42***<br>(1.22,1.64)  | 1.50***<br>(1.30,1.74)  | 1.47***<br>(1.26,1.70)  | 1.62***<br>(1.39,1.89)  |
| Poverty                           |                         |                         |                         |                         |
| Poor                              | 1                       | 1                       | 1                       | 1                       |
| Non-poor                          | 1.79***<br>(1.60,2.01)  | 1.70***<br>(1.53,1.89)  | 1.65***<br>(1.47,1.84)  | 1.56***<br>(1.40,1.73)  |
| Do not know income                | 1.94***<br>(1.62,2.31)  | 1.57***<br>(1.34,1.85)  | 1.38***<br>(1.17,1.63)  | 1.40***<br>(1.16,1.68)  |
| Occupation                        |                         |                         |                         |                         |
| Skill level 3 or 4                | 1                       | 1                       | 1                       | 1                       |
| Skill level 2                     | 1.06<br>(0.93,1.22)     | 1.05<br>(0.92,1.19)     | 1.06<br>(0.93,1.22)     | 1.11<br>(0.96,1.28)     |
| Skill level 1                     | 1.19<br>(0.95,1.49)     | 1.06<br>(0.84,1.34)     | 0.99<br>(0.79,1.24)     | 1.03<br>(0.82,1.29)     |
| Non-employed                      | 0.96<br>(0.83,1.11)     | 1.11<br>(0.98,1.27)     | 1.03<br>(0.89,1.18)     | 1.07<br>(0.92,1.24)     |
| Place of residence                |                         |                         |                         |                         |

|                                        |             |             |             |             |
|----------------------------------------|-------------|-------------|-------------|-------------|
| Rural                                  | 1           | 1           | 1           | 1           |
| Urban                                  | 1.11*       | 1.03        | 1.10        | 1.19**      |
|                                        | (1.01,1.22) | (0.93,1.13) | (0.99,1.21) | (1.08,1.31) |
| <b>Individual-level social capital</b> |             |             |             |             |
| Frequency of socializing               |             |             |             |             |
| Low                                    | 1           | 1           | 1           | 1           |
| High                                   | 1.21***     | 1.20***     | 1.22***     | 1.28***     |
|                                        | (1.11,1.32) | (1.11,1.30) | (1.12,1.33) | (1.18,1.40) |
| Civic participation                    |             |             |             |             |
| No                                     | 1           | 1           | 1           | 1           |
| Yes                                    | 0.97        | 1.04        | 1.12**      | 1.06        |
|                                        | (0.90,1.05) | (0.96,1.12) | (1.04,1.22) | (0.98,1.15) |
| Trust                                  |             |             |             |             |
| Low                                    | 1           | 1           | 1           | 1           |
| High                                   | 1.36***     | 1.32***     | 1.35***     | 1.35***     |
|                                        | (1.26,1.47) | (1.22,1.42) | (1.25,1.45) | (1.25,1.46) |
| <b>County-level social capital</b>     |             |             |             |             |
| Frequency of socializing (%)           | 1.00        | 1.00        | 1.01        | 1.00        |
|                                        | (0.99,1.02) | (0.99,1.01) | (0.99,1.02) | (0.99,1.01) |
| Civic participation (%)                | 1.01        | 1.01*       | 1.00        | 1.01        |
|                                        | (1.00,1.01) | (1.00,1.02) | (0.99,1.01) | (1.00,1.01) |
| Trust (%)                              | 0.99        | 1.00        | 0.99        | 1.00        |
|                                        | (0.98,1.00) | (1.00,1.01) | (0.98,1.00) | (0.99,1.01) |
| <i>N of individuals</i>                | 10,827      | 11,104      | 10,663      | 10,235      |
| <i>N of counties</i>                   | 133         | 131         | 126         | 130         |

\* p < 0.05, \*\* p < 0.01, \*\*\* p < 0.001

## References

- 1 National People's Congress. Organic Law of the Urban Residents Committee of the People's Republic of China. 2010. [http://www.npc.gov.cn/wxzl/gongbao/1989-12/26/content\\_1481131.htm](http://www.npc.gov.cn/wxzl/gongbao/1989-12/26/content_1481131.htm) (accessed Feb 9, 2020).
- 2 National People's Congress. Organic Law of the Villagers' Committees of the People's Republic of China. 1989. [http://www.gov.cn/flfg/2010-10/28/content\\_1732986.htm](http://www.gov.cn/flfg/2010-10/28/content_1732986.htm) (accessed Feb 9, 2020).
- 3 Borgonovi F. A life-cycle approach to the analysis of the relationship between social capital and health in Britain. *Social Science & Medicine* 2010; **71**: 1927–34.
- 4 Islam MK, Gerdtham U-G, Gullberg B, Lindström M, Merlo J. Social capital externalities and mortality in Sweden. *Economics & Human Biology* 2008; **6**: 19–42.
- 5 Iversen T. An exploratory study of associations between social capital and self-assessed health in Norway. *Health Economics, Policy and Law* 2008; **3**: 349–64.
- 6 Sundquist J, Hamano T, Li X, Kawakami N, Shiwa K, Sundquist K. Neighborhood linking social capital as a predictor of psychiatric medication prescription in the elderly: A Swedish national cohort study. *Journal of Psychiatric Research* 2014; **55**: 44–51.
- 7 Subramanian SV, Lochner KA, Kawachi I. Neighborhood differences in social capital: a compositional artifact or a contextual construct? *Health & Place* 2003; **9**: 33–44.
- 8 Mohnen SM, Groenewegen PP, Völker B, Flap H. Neighborhood social capital and individual health. *Social Science & Medicine* 2011; **72**: 660–7.
- 9 Han S. Compositional and contextual associations of social capital and self-rated health in Seoul, South Korea: A multilevel analysis of longitudinal evidence. *Social Science & Medicine* 2013; **80**: 113–20.
- 10 Snelgrove JW, Pikhart H, Stafford M. A multilevel analysis of social capital and self-rated health: Evidence from the British Household Panel Survey. *Social Science & Medicine* 2009; **68**: 1993–2001.
- 11 International Labour Office. International Standard Classification of Occupations. Geneva, 2012 [https://www.ilo.org/wcmsp5/groups/public/---dgreports/---dcomm/---publ/documents/publication/wcms\\_172572.pdf](https://www.ilo.org/wcmsp5/groups/public/---dgreports/---dcomm/---publ/documents/publication/wcms_172572.pdf) (accessed March 10, 2020).
- 12 Asparouhov T. General Multi-Level Modeling with Sampling Weights. *Communications in Statistics - Theory and Methods* 2006; **35**: 439–60.
- 13 Pfeiffermann D, Skinner CJ, Holmes DJ, Goldstein H, Rasbash J. Weighting for unequal selection probabilities in multilevel models. *Journal of the Royal Statistical Society: Series B (Statistical Methodology)* 1998; **60**: 23–40.
- 14 Rabe-Hesketh S, Skrondal A. Multilevel modelling of complex survey data. *Journal of the Royal Statistical Society: Series A (Statistics in Society)* 2006; **169**: 805–27.

- 15 Carle AC. Fitting multilevel models in complex survey data with design weights: Recommendations. *BMC Medical Research Methodology* 2009; **9**. DOI:10.1186/1471-2288-9-49.
